# Supplementary material for: Functional cross-talk between allosteric effects of activating and inhibiting ligands underlies PKM2 regulation
Source: eLife. 2019 Jul 2;8:e45068. doi: 10.7554/eLife.45068 (PMC6636998; doi:10.7554/eLife.45068)
Supplement: Supplementary file 1. [file elife-45068-supp1.xlsx]

## Sheet: PRM_MS2_Quant_HCT116_LN2
Area	Product Mz	Fragment Ion	Precursor Mz	ACM8833A24RW3_A1 Area	ACM8833A24RW4_A1 Area	ACM8833A24RW5_A1 Area	ACM8833A25RW3_B1 Area	ACM8833A25RW4_B1 Area	ACM8833A25RW5_B1 Area	ACM8833A26RW3_C1 Area	ACM8833A26RW4_C1 Area	ACM8833A26RW5_C1 Area	ACM8833A27RW4_D1 Area	ACM8833A27RW4_D12 Area	ACM8833A27RW5_D1 Area
Peptide sequence	Product Mz	Fragment Ion	Precursor Mz	HCT116_1	HCT116_2	HCT116_3	LN229_1	LN229_2	LN229_3	MCF7_1	MCF7_2	MCF7_3	SN12C_1	SN12C_2	SN12C_3
ITLDNAYMEK	983.45	y8	599.295	501891584	465368320	507617632	253116304	234790208	228458192	516242592	453566912	508318528	620983424	611084672	578509952
ITLDNAYMEK	870.366	y7	599.295	484561984	458855520	509945920	235881008	227699680	230073472	544889920	443751520	491544160	652352768	651240256	638665408
ITLDNAYMEK	407.196	y3	599.295	380863008	379298080	417608032	173332320	165762720	173370960	427086176	344058656	375316096	513809216	513049440	536101088
ITLDNAYMEK[13C615N2]	991.464	y8	603.302	325845536	301462432	323489824	321042432	300775680	284603200	390696160	324673920	355169984	384413792	384049216	387099072
ITLDNAYMEK[13C615N2]	878.38	y7	603.302	305234784	301816320	319401856	309866304	280403456	271752128	396563520	327383552	364988768	395145376	394657952	399604992
ITLDNAYMEK[13C615N2]	415.21	y3	603.302	261978528	252817408	272202400	223844256	215878704	217040784	324608032	266685344	289802976	328699040	328385792	342478592
GDLGIEIPAEK	856.477	y8	571.309	684043200	756041664	762990400	277427520	227709040	226070576	629412928	686718592	768117824	935328320	939505088	978102464
GDLGIEIPAEK	686.372	y6	571.309	814416960	882429760	882712192	320063392	265469200	260536304	733057472	778825792	904243648	1103223936	1107455232	1131987072
GDLGIEIPAEK	444.245	y4	571.309	3319249664	3558120704	3703595520	1192894592	959394432	970701568	2921464320	3052299520	3549703680	4459748352	4479288832	4697172992
GDLGIEIPAEK[13C615N2]	864.492	y8	575.316	466425920	519128192	512479072	410063040	320729856	299516224	487315296	523104064	604852480	620111808	622359552	657165696
GDLGIEIPAEK[13C615N2]	694.386	y6	575.316	495291136	564053568	550502656	429053888	340513344	322000832	506518048	554283136	645810816	677984320	679742272	699086336
GDLGIEIPAEK[13C615N2]	452.259	y4	575.316	2010854144	2239612672	2240953344	1579312512	1229153024	1196255616	2029253888	2169024000	2532009728	2730744832	2737980416	2817470720
APIIAVTR	792.425	y6	453.258	25263070	27179646	26227446	1572749	624610	1024395	4051230	3714172	3742142	8360818	8930773	8168458
APIIAVTR	645.357	y5	453.258	51324544	55967944	54074892	2583628	1805438	2405960	8791633	8210775	7959677	18604570	18432342	17517936
APIIAVTR	516.314	y4	453.258	17970640	19655536	19694516	803240	648043	528861	3024903	2993200	2658282	6619873	6558914	6236445
APIIAVTR[13C615N4]	802.433	y6	458.262	381887648	430201984	399696800	189200768	137335360	134520560	480701408	443058112	378931808	525257760	518698848	492424960
APIIAVTR[13C615N4]	655.365	y5	458.262	888754240	1004495424	954058176	457801120	338361888	328298368	1170269568	1060723584	919046080	1253321984	1235928960	1173527680
APIIAVTR[13C615N4]	526.322	y4	458.262	326159488	374152736	340827360	157100736	119128432	114831440	412308704	380769184	325824704	453696768	447225184	423196864
LFEELVR	672.44	y6	420.769	1235776128	1357768064	1427293952	515918368	462989376	440663552	1355056384	1283922432	1247625600	1746616320	1739705344	1723133184
LFEELVR	559.356	y5	420.769	2497232384	2656010496	2849454080	1145808128	1046574464	979147776	2636023296	2516274944	2428938240	3418726144	3403915264	3371327744
LFEELVR	446.272	y4	420.769	1398275840	1469477120	1583865088	629828800	576464512	541438464	1461753344	1353347968	1339505536	1889422592	1884636672	1849636352
LFEELVR[13C615N4]	682.449	y6	425.773	932185792	1028948992	1035833408	931733760	817228928	850061376	1122665344	1026745024	1022227456	1276430336	1266287616	1195632896
LFEELVR[13C615N4]	569.364	y5	425.773	1598939392	1803155968	1835025920	1610766592	1393919360	1456140416	1937808640	1822604032	1754098432	2185346816	2163966464	2059235072
LFEELVR[13C615N4]	456.28	y4	425.773	1000224064	1134345856	1158056192	997199680	884216384	917390912	1198099328	1126514048	1085828992	1369676800	1351251968	1290949504
LAPITSDPTEATAVGAVEASFK	1477.75	y15	1088.06	768317184	819318912	652596864	454960384	445328416	369854432	120584256	153492016	159580688	262710928	262710928	280826816
LAPITSDPTEATAVGAVEASFK	808.42	y8	1088.06	433321536	467464704	369909024	274810144	266135408	223246928	75072808	94744952	100419704	172868848	172868848	183248336
LAPITSDPTEATAVGAVEASFK	452.25	y4	1088.06	181527920	193754144	152885280	116396240	113109600	89393960	32574420	40458404	41017980	74876976	74876976	77706720
LAPITSDPTEATAVGAVEASFK[13C615N2]	1485.77	y15	1092.07	406034272	439481184	343088512	430801792	433611232	375850592	61670532	76889224	80200008	119456080	119456080	125744912
LAPITSDPTEATAVGAVEASFK[13C615N2]	816.434	y8	1092.07	223798160	245760256	191636352	261141984	258531632	218673232	37484724	46740928	49359784	80593096	80593096	81304048
LAPITSDPTEATAVGAVEASFK[13C615N2]	460.265	y4	1092.07	78142376	84729328	66746468	89765520	92809784	78754904	13394875	17709276	17946738	29897656	29897656	31413172

## Sheet: ITLDNAYMEK
Peptide sequence	Precursor Mz	Product Mz	Fragment Ion	HCT116_1	HCT116_2	HCT116_3	LN229_1	LN229_2	LN229_3	MCF7_1	MCF7_2	MCF7_3	SN12C_1	SN12C_2	SN12C_3
ITLDNAYMEK	599.295	983.45	y8	501891584	465368320	507617632	253116304	234790208	228458192	516242592	453566912	508318528	620983424	611084672	578509952
ITLDNAYMEK	599.295	870.366	y7	484561984	458855520	509945920	235881008	227699680	230073472	544889920	443751520	491544160	652352768	651240256	638665408
ITLDNAYMEK	599.295	407.196	y3	380863008	379298080	417608032	173332320	165762720	173370960	427086176	344058656	375316096	513809216	513049440	536101088
ITLDNAYMEK[13C615N2]	603.302	991.464	y8	325845536	301462432	323489824	321042432	300775680	284603200	390696160	324673920	355169984	384413792	384049216	387099072
ITLDNAYMEK[13C615N2]	603.302	878.38	y7	305234784	301816320	319401856	309866304	280403456	271752128	396563520	327383552	364988768	395145376	394657952	399604992
ITLDNAYMEK[13C615N2]	603.302	415.21	y3	261978528	252817408	272202400	223844256	215878704	217040784	324608032	266685344	289802976	328699040	328385792	342478592
			Sum ITLDNAYMEK	1367316576	1303521920	1435171584	662329632	628252608	631902624	1488218688	1241377088	1375178784	1787145408	1775374368	1753276448
			Sum ITLDNAYMEK[13C615N2]	893058848	856096160	915094080	854752992	797057840	773396112	1111867712	918742816	1009961728	1108258208	1107092960	1129182656
			Amount of native ITLDNAYMEK (fmol µg-1)	153.105	152.263	156.833	77.4878	78.8215	81.7049	133.849	135.117	136.161	161.257	160.364	155.27
	Average amount of native ITLDNAYMEK per cell line
	Cell line	HCT116	LN229	MCF7	SN12C
		153.105	77.4878	133.849	161.257
		152.263	78.8215	135.117	160.364
		156.833	81.7049	136.161	155.27
	Average (fmol µg-1)	154.067	79.3381	135.042	158.963
	SD	2.43211	2.15548	1.15827	3.23006
	CV %	1.57861	2.71683	0.85771	2.03195

## Sheet: GDLGIEIPAEK
Peptide sequence	Precursor Mz	Product Mz	Fragment Ion	HCT116_1	HCT116_2	HCT116_3	LN229_1	LN229_2	LN229_3	MCF7_1	MCF7_2	MCF7_3	SN12C_1	SN12C_2	SN12C_3
GDLGIEIPAEK	571.309	856.477	y8	684043200	756041664	762990400	277427520	227709040	226070576	629412928	686718592	768117824	935328320	939505088	978102464
GDLGIEIPAEK	571.309	686.372	y6	814416960	882429760	882712192	320063392	265469200	260536304	733057472	778825792	904243648	1103223936	1107455232	1131987072
GDLGIEIPAEK	571.309	444.245	y4	3319249664	3558120704	3703595520	1192894592	959394432	970701568	2921464320	3052299520	3549703680	4459748352	4479288832	4697172992
GDLGIEIPAEK[13C615N2]	575.316	864.492	y8	466425920	519128192	512479072	410063040	320729856	299516224	487315296	523104064	604852480	620111808	622359552	657165696
GDLGIEIPAEK[13C615N2]	575.316	694.386	y6	495291136	564053568	550502656	429053888	340513344	322000832	506518048	554283136	645810816	677984320	679742272	699086336
GDLGIEIPAEK[13C615N2]	575.316	452.259	y4	2010854144	2239612672	2240953344	1579312512	1229153024	1196255616	2029253888	2169024000	2532009728	2730744832	2737980416	2817470720
			Sum GDLGIEIPAEK	4817709824	5196592128	5349298112	1790385504	1452572672	1457308448	4283934720	4517843904	5222065152	6498300608	6526249152	6807262528
			Sum GDLGIEIPAEK[13C615N2]	2972571200	3322794432	3303935072	2418429440	1890396224	1817772672	3023087232	3246411200	3782673024	4028840960	4040082240	4173722752
			Amount of native GDLGIEIPAEK (fmol µg-1)	162.072	156.392	161.907	74.0309	76.8396	80.17	141.707	139.164	138.052	161.295	161.538	163.098
	Average amount of native GDLGIEIPAEK per cell line
	Cell line	HCT116	LN229	MCF7	SN12C
		162.072	74.0309	141.707	161.295
		156.392	76.8396	139.164	161.538
		161.907	80.17	138.052	163.098
	Average(fmol µg-1)	160.124	77.0135	139.641	161.977
	SD	3.23265	3.07324	1.87362	0.97871
	CV %	2.01885	3.99052	1.34174	0.604229

## Sheet: APIIAVTR
Peptide sequence	Precursor Mz	Product Mz	Fragment Ion	HCT116_1	HCT116_2	HCT116_3	LN229_1	LN229_2	LN229_3	MCF7_1	MCF7_2	MCF7_3	SN12C_1	SN12C_2	SN12C_3
APIIAVTR	420.769	672.44	y6	1235776128	1357768064	1427293952	515918368	462989376	440663552	1355056384	1283922432	1247625600	1746616320	1739705344	1723133184
APIIAVTR	420.769	559.356	y5	2497232384	2656010496	2849454080	1145808128	1046574464	979147776	2636023296	2516274944	2428938240	3418726144	3403915264	3371327744
APIIAVTR	420.769	446.272	y4	1398275840	1469477120	1583865088	629828800	576464512	541438464	1461753344	1353347968	1339505536	1889422592	1884636672	1849636352
APIIAVTR[13C615N4]	425.773	682.449	y6	932185792	1028948992	1035833408	931733760	817228928	850061376	1122665344	1026745024	1022227456	1276430336	1266287616	1195632896
APIIAVTR[13C615N4]	425.773	569.364	y5	1598939392	1803155968	1835025920	1610766592	1393919360	1456140416	1937808640	1822604032	1754098432	2185346816	2163966464	2059235072
APIIAVTR[13C615N4]	425.773	456.28	y4	1000224064	1134345856	1158056192	997199680	884216384	917390912	1198099328	1126514048	1085828992	1369676800	1351251968	1290949504
			Sum APIIAVTR	5131284352	5483255680	5860613120	2291555296	2086028352	1961249792	5452833024	5153545344	5016069376	7054765056	7028257280	6944097280
			Sum APIIAVTR[13C615N4]	3531349248	3966450816	4028915520	3539700032	3095364672	3223592704	4258573312	3975863104	3862154880	4831453952	4781506048	4545817472
			Amount of native APIIAVTR (fmol µg-1)	145.307	138.241	145.464	64.7387	67.392	60.8405	128.044	129.621	129.877	146.017	146.988	152.758
	Average amount of native APIIAVTR per cell line
	Cell line	HCT116	LN229	MCF7	SN12C
		145.307	64.7387	128.044	146.017
		138.241	67.392	129.621	146.988
		145.464	60.8405	129.877	152.758
	Average (fmol µg-1)	143.004	64.3237	129.181	148.588
	SD	4.12554	3.29541	0.992988	3.64384
	CV %	2.88492	5.12316	0.768682	2.45231

## Sheet: LFEELVR
Peptide sequence	Precursor Mz	Product Mz	Fragment Ion	HCT116_1	HCT116_2	HCT116_3	LN229_1	LN229_2	LN229_3	MCF7_1	MCF7_2	MCF7_3	SN12C_1	SN12C_2	SN12C_3
LFEELVR	453.258	792.425	y6	25263070	27179646	26227446	1572749	624610	1024395	4051230	3714172	3742142	8360818	8930773	8168458
LFEELVR	453.258	645.357	y5	51324544	55967944	54074892	2583628	1805438	2405960	8791633	8210775	7959677	18604570	18432342	17517936
LFEELVR	453.258	516.314	y4	17970640	19655536	19694516	803240	648043	528861	3024903	2993200	2658282	6619873	6558914	6236445
LFEELVR[13C615N4]	458.262	802.433	y6	381887648	430201984	399696800	189200768	137335360	134520560	480701408	443058112	378931808	525257760	518698848	492424960
LFEELVR[13C615N4]	458.262	655.365	y5	888754240	1004495424	954058176	457801120	338361888	328298368	1170269568	1060723584	919046080	1253321984	1235928960	1173527680
LFEELVR[13C615N4]	458.262	526.322	y4	326159488	374152736	340827360	157100736	119128432	114831440	412308704	380769184	325824704	453696768	447225184	423196864
			Sum LFEELVR	94558254	102803126	99996854	4959617	3078091	3959216	15867766	14918147	14360101	33585261	33922029	31922839
			Sum LFEELVR[13C615N4]	1596801376	1808850144	1694582336	804102624	594825680	577650368	2063279680	1884550880	1623802592	2232276512	2201852992	2089149504
			Amount of native LFEELVR (fmol µg-1)	5.92173	5.68334	5.90097	0.616789	0.517478	0.6854	0.769056	0.791602	0.88435	1.50453	1.54061	1.52803
	Average amount of native LFEELVR per cell line
	Cell line	HCT116	LN229	MCF7	SN12C
		5.92173	0.616789	0.769056	1.50453
		5.68334	0.517478	0.791602	1.54061
		5.90097	0.6854	0.88435	1.52803
	Average (fmol µg-1)	5.83535	0.606556	0.815003	1.52439
	SD	0.13205	0.0844276	0.0611056	0.0183148
	CV %	2.26294	13.9192	7.4976	1.20145

## Sheet: LAPITSDPTEATAVGAVEASFK
Peptide sequence	Precursor Mz	Product Mz	Fragment Ion	HCT116_1	HCT116_2	HCT116_3	LN229_1	LN229_2	LN229_3	MCF7_1	MCF7_2	MCF7_3	SN12C_1	SN12C_2	SN12C_3
LAPITSDPTEATAVGAVEASFK	1088.06	1477.75	y15	768317184	819318912	652596864	454960384	445328416	369854432	120584256	153492016	159580688	262710928	262710928	280826816
LAPITSDPTEATAVGAVEASFK	1088.06	808.42	y8	433321536	467464704	369909024	274810144	266135408	223246928	75072808	94744952	100419704	172868848	172868848	183248336
LAPITSDPTEATAVGAVEASFK	1088.06	452.25	y4	181527920	193754144	152885280	116396240	113109600	89393960	32574420	40458404	41017980	74876976	74876976	77706720
LAPITSDPTEATAVGAVEASFK[13C615N2]	1092.07	1485.77	y15	406034272	439481184	343088512	430801792	433611232	375850592	61670532	76889224	80200008	119456080	119456080	125744912
LAPITSDPTEATAVGAVEASFK[13C615N2]	1092.07	816.434	y8	223798160	245760256	191636352	261141984	258531632	218673232	37484724	46740928	49359784	80593096	80593096	81304048
LAPITSDPTEATAVGAVEASFK[13C615N2]	1092.07	460.265	y4	78142376	84729328	66746468	89765520	92809784	78754904	13394875	17709276	17946738	29897656	29897656	31413172
			Sum LAPITSDPTEATAVGAVEASFK	1383166640	1480537760	1175391168	846166768	824573424	682495320	228231484	288695372	301018372	510456752	510456752	541781872
			Sum LAPITSDPTEATAVGAVEASFK[13C615N2]	707974808	769970768	601471332	781709296	784952648	673278728	112550131	141339428	147506530	229946832	229946832	238462132
			Amount of native LAPITSDPTEATAVGAVEASFK (fmol µg-1)	156.296	153.828	156.335	86.5966	84.038	81.0951	162.226	163.405	163.257	177.591	177.591	181.759
	Average amount of native LAPITSDPTEATAVGAVEASFK per cell line
	Cell line	HCT116	LN229	MCF7	SN12C
		156.3	86.6	162.23	177.59
		153.83	84.04	163.41	177.59
		156.34	81.1	163.26	181.76
	Average (fmol µg-1)	155.49	83.9133	162.967	178.98
	SD	1.43774	2.75219	0.642365	2.40755
	CV %	0.924652	3.2798	0.39417	1.34515
